# Supplementary material
Source: Springer Nature journal article supplement (https://www.springermedizin.de/resource/supplementary/12916_2012_712_MOESM2_ESM.pdf/9598728)
Supplement: MOESM2 [file 9598728]

# DRY EYE

## Aqueous-deficient

### Sjogren Syndrome Dry Eye

Primary

Secondary

### Non-Sjogren Dry Eye

Lacrimal Deficiency

Lacrimal Gland Duct Obstruction

Reflex Block

Systemic Drugs

## Evaporative

### Intrinsic

Meibomian Oil Deficiency

Disorders of Lid Aperture

Low Blink Rate

Drug Action  
Accutane

### Extrinsic

Vitamin A-Deficiency

Topical Drugs  
Preservatives

Contact Lens  
Wear

Ocular Surface  
Disease  
eg, Allergy

### Effect of the Environment

#### *Milieu Interieur*

Low blink rate  
behavior, VTU,  
microscopy  
Wide lid aperture  
gaze position  
Aging  
Low androgen pool  
Systemic Drugs:  
antihistamines,  
beta-blockers,  
antispasmodics,  
diuretics, and  
some psychotropic  
drugs

#### *Milieu Exterieur*

Low relative humidity  
High wind velocity  
Occupational  
environment
